# Supplementary material for: Dynamically adaptive soft metamaterial for wearable human–machine interfaces
Source: Springer Nature journal article supplement (doi:10.1038/s41467-025-57634-8), 2025-03-19
Supplement: MOESM1 [file 41467_2025_57634_MOESM1_ESM.pdf]

# **Dynamically Adaptive Soft Metamaterial for Wearable Human-Machines Interfaces**

Ugur Tanriverdi<sup>1,2†</sup>, Guglielmo Senesi<sup>1,2†</sup>, Tarek Asfour<sup>1,2†</sup>, Hasan Kurt<sup>1</sup>, Sabrina L. Smith<sup>1,3</sup>,  
Diana Toderita<sup>1</sup>, Joseph Shalhoub<sup>4,5</sup>, Laura Burgess<sup>6</sup>, Anthony Bull<sup>1</sup>, Firat Güder<sup>1\*</sup>

<sup>1</sup> Department of Bioengineering, Imperial College London, London, SW7 2AZ, UK.

<sup>2</sup> Unhindr Ltd, Burford Road, London, E15 2SP, UK.

<sup>3</sup> Barts and the London School of Medicine and Dentistry, Queen Mary University of London, London, E1 2AD, UK.

<sup>4</sup> Imperial Vascular Unit, Imperial College Healthcare NHS Trust, St Mary's Hospital, London W2 1NY, UK.

<sup>5</sup> Department of Surgery and Cancer, Imperial College London, London, SW7 2AZ, UK

<sup>6</sup> Charing Cross Hospital, Imperial College Healthcare NHS Trust, London, W6 8RF, UK.

<sup>†</sup> These authors contributed equally to this work: Ugur Tanriverdi, Guglielmo Senesi, Tarek Asfour.

\* Corresponding author. Email: [guder@ic.ac.uk](mailto:guder@ic.ac.uk)

## Experimental Details

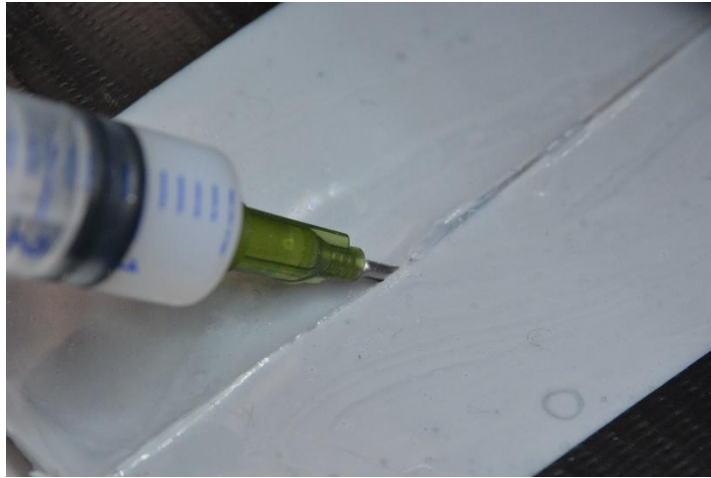

**Fig. S1.** The Roliner cylinder closure was realized using with Silpoxy glue. The application of Silpoxy glue between the unmet ends of the Roliner cylinder was performed using a blunt-end syringe underneath a sacrificial adhesive tape.

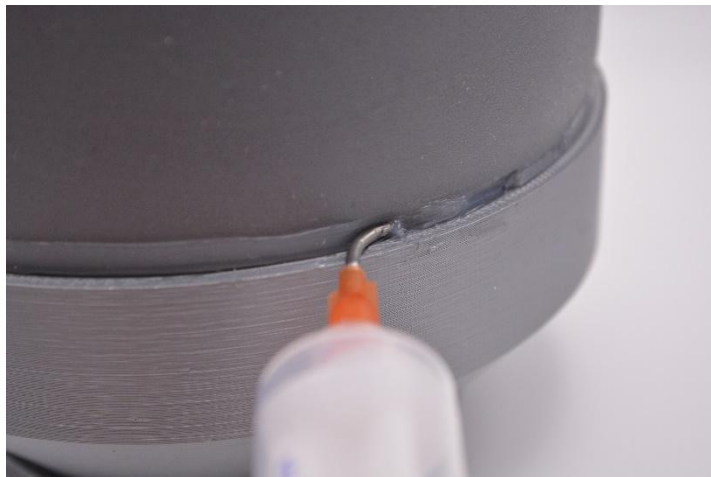

**Fig. S2.** The bottom dome of the Roliner is sealed using again Silpoxy glue. The glue was applied using a blunt-end bent syringe while the dome is pressure fitted into the reconfigurable composite.

## Tensile Elasticity (TE)

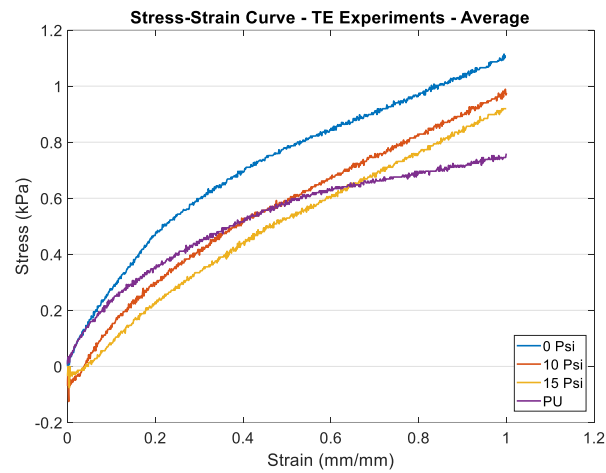

**Fig. S3.** The average stress vs strain graph of specimens used in tensile elasticity test. The tensile elasticity test is described in Fig. 3 in the main article. The reconfigurable composite samples which are actuated with actuation pressure of 0, 10, and 15 psi in comparison to bare polyurethane (PU) sample.

## Compressive Elasticity (CE)

**Table S1.** The batch and specimen information of samples used in compressive elasticity tests in Fig. 3. Three different batches and six specimens in each batch are evaluated in terms of contact load (N) at thickness measurement and thickness (mm). The thickness of each specimen was measured and recorded individually. The average values are presented in the last column of the table.

| Batch #1                                  | Specimen #1 | Specimen #2 | Specimen #3 | Specimen #4 | Specimen #5 | Specimen #6 | Average |
|-------------------------------------------|-------------|-------------|-------------|-------------|-------------|-------------|---------|
| Contact Load at thickness measurement (N) | 3.3         | 3.3         | 3.2         | 4.1         | 3.2         | 3.3         | 3.40    |
| Thickness (mm)                            | 6.68        | 6.52        | 6.7         | 6.58        | 6.56        | 6.71        | 6.63    |
| Batch #2                                  | Specimen #1 | Specimen #2 | Specimen #3 | Specimen #4 | Specimen #5 | Specimen #6 | -       |
| Contact Load at thickness measurement (N) | 3.2         | 3           | 2.7         | 3.8         | 3.8         | 2.4         | 3.15    |
| Thickness (mm)                            | 6.57        | 6.66        | 6.59        | 6.69        | 6.63        | 6.61        | 6.63    |
| Batch #3                                  | Specimen #1 | Specimen #2 | Specimen #3 | Specimen #4 | Specimen #5 | Specimen #6 | -       |
| Contact Load at thickness measurement (N) | 2.7         | 3.6         | 2.6         | 3.9         | 2.6         | 3.3         | 3.12    |
| Thickness (mm)                            | 6.74        | 6.41        | 6.65        | 6.69        | 6.69        | 6.64        | 6.64    |

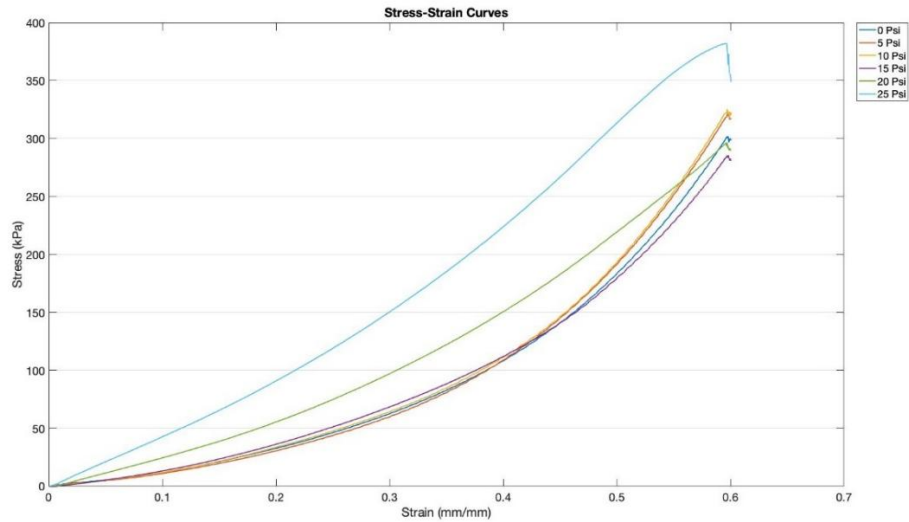

**Fig. S4.** Stress vs strain graph of all specimens in compressive elasticity test. The average stress vs strain graph of specimens used in compressive elasticity test. The compressive elasticity test is described in Fig. 3. in the main article. The reconfigurable composite samples which are actuated with actuation pressure of 0 – 25 psi.

## Volumetric Elasticity (VE)

**Table S2.** The batch and specimen information of samples used in volumetric elasticity tests in Fig. 3. Three different batches and six specimens in each batch are evaluated in terms of contact load (N) at thickness measurement and thickness (mm). The thickness of each specimen was measured and recorded individually. The average values are presented in the last column of the table.

| Batch #1                                  | Specimen #1 | Specimen #2 | Specimen #3 | Specimen #4 | Specimen #5 | Specimen #6 | Average |
|-------------------------------------------|-------------|-------------|-------------|-------------|-------------|-------------|---------|
| Contact Load at thickness measurement (N) | 3.5         | 2.4         | 3.5         | 3.6         | 3           | 3.3         | 3.22    |
| Thickness (mm)                            | 6.49        | 6.43        | 6.72        | 6.47        | 6.71        | 6.53        | 6.56    |
| Batch #2                                  | Specimen #1 | Specimen #2 | Specimen #3 | Specimen #4 | Specimen #5 | Specimen #6 | -       |
| Contact Load at thickness measurement (N) | 3.9         | 3.8         | 2.9         | 3           | 3.9         | 3.3         | 3.47    |
| Thickness (mm)                            | 6.5         | 6.56        | 6.64        | 6.68        | 6.73        | 6.78        | 6.65    |
| Batch #3                                  | Specimen #1 | Specimen #2 | Specimen #3 | Specimen #4 | Specimen #5 | Specimen #6 | -       |
| Contact Load at thickness measurement (N) | 3.3         | 3.9         | 3.2         | 3.2         | 3           | 3.5         | 3.35    |
| Thickness (mm)                            | 6.63        | 6.72        | 6.63        | 6.76        | 6.5         | 6.5         | 6.62    |

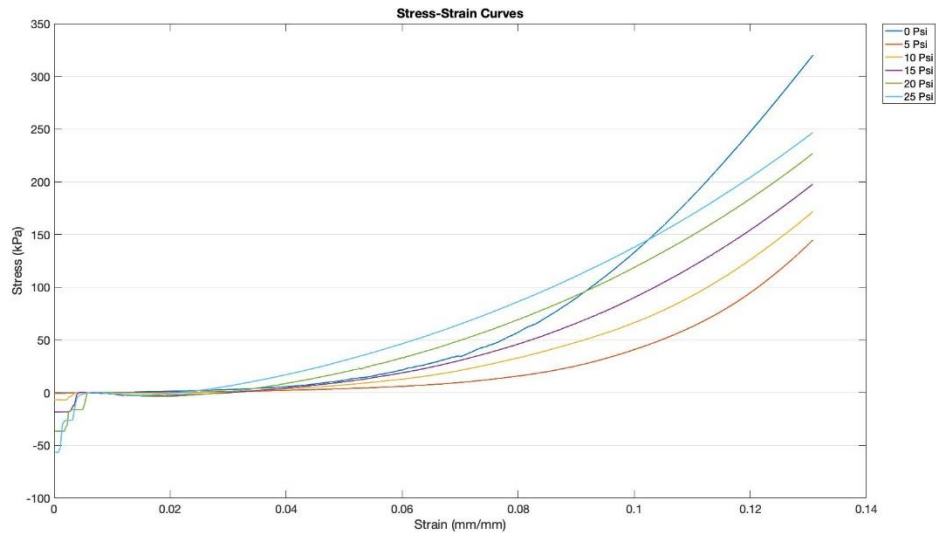

**Fig. S5.** Stress vs strain graph of all specimens in volumetric elasticity test. The average stress vs strain graph of specimens used in volumetric elasticity test. The volumetric elasticity test is described in Fig. 3. in the main article. The reconfigurable composite samples which are actuated with actuation pressure of 0 – 25 psi.

### Liner Characterization

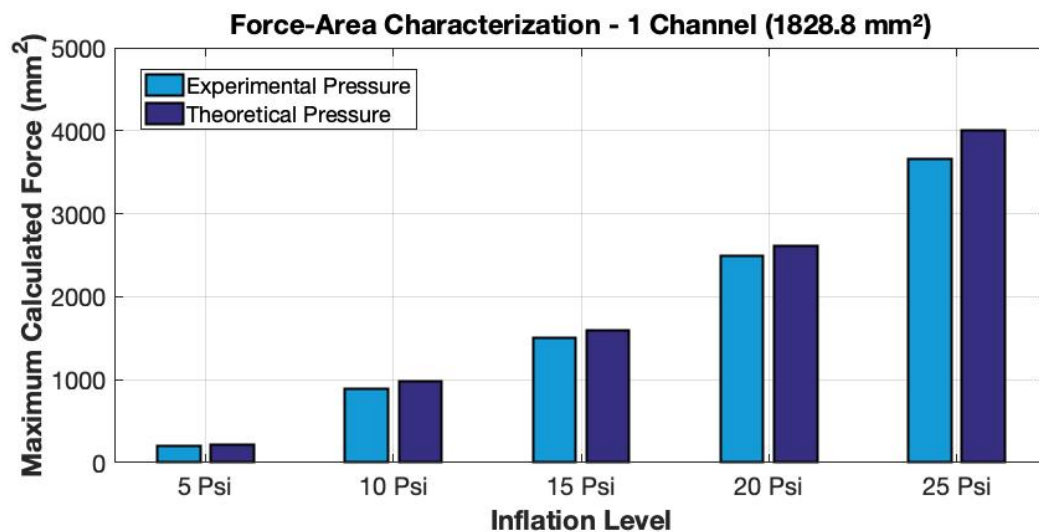

**Fig. S6.** Force-Area characterization of Roliner with a single channel actuated configuration at different actuation (inflation) pressure levels between 5 – 25 psi (with 5 psi intervals). The single channel constitutes an area of 1828.8 mm<sup>2</sup> actuated area in the Roliner. The experimental and theoretical pressure values were represented with blue- and purple-colored bars, respectively.

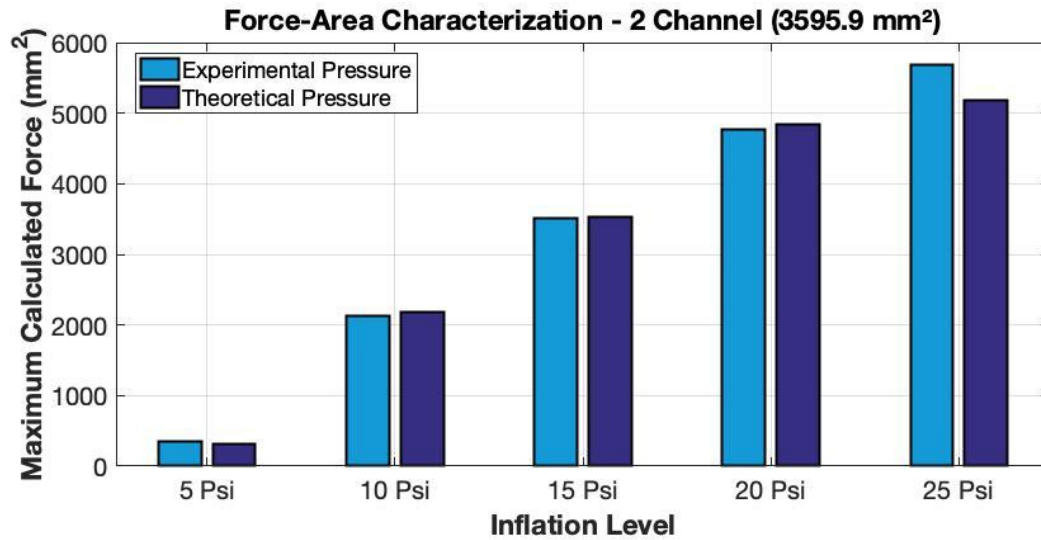

**Fig. S7.** Force-Area characterization of Roliner with two-channel actuated configuration at different actuation (inflation) pressure levels between 5 – 25 psi (with 5 psi intervals). The single channel constitutes an area of 3595.9 mm<sup>2</sup> actuated area in the Roliner. The experimental and theoretical pressure values were represented with blue- and purple-colored bars, respectively.

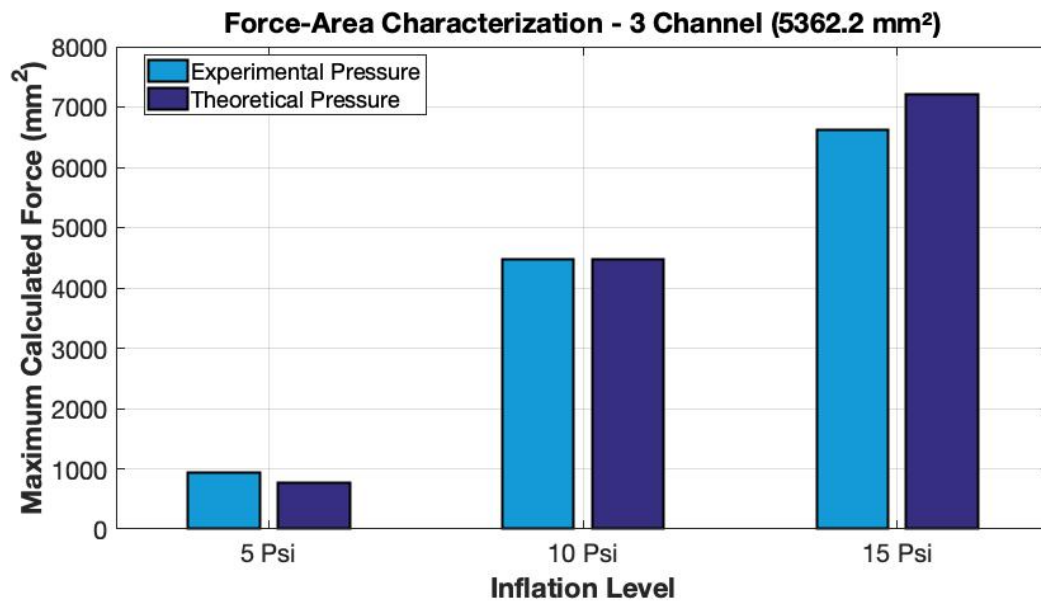

**Fig. S8.** Force-Area characterization of Roliner with three-channel actuated configuration at different actuation (inflation) pressure levels between 5 – 15 psi (with 5 psi intervals). The single channel constitutes an area of 5362.2 mm<sup>2</sup> actuated area in the Roliner. The experimental and theoretical pressure values were represented with blue and purple colored bars, respectively.

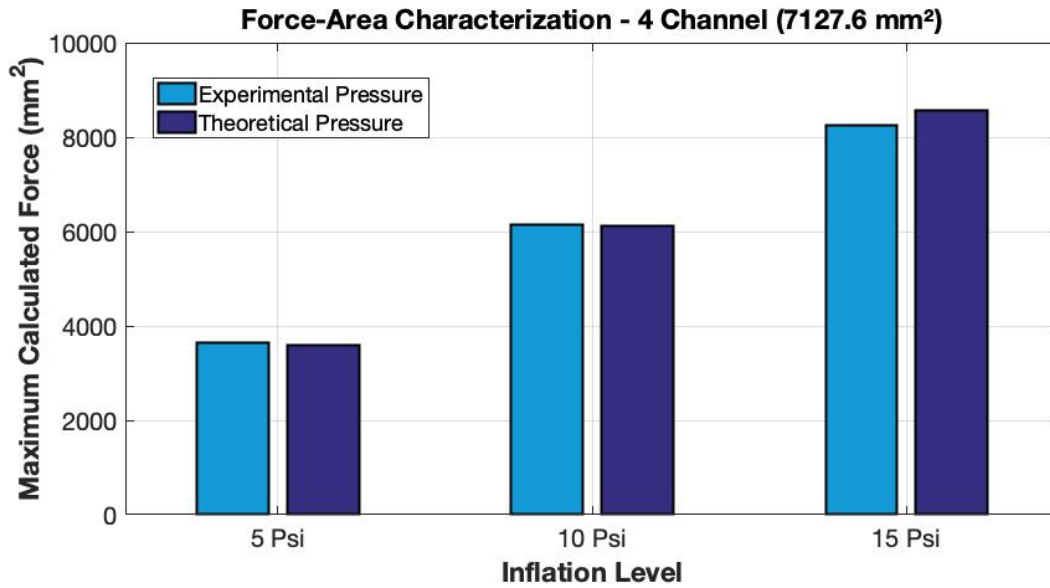

**Fig. S9.** Force-Area characterization of Roliner with four-channel (all) actuated configuration at different actuation (inflation) pressure levels between 5 – 15 psi (with 5 psi intervals). The single channel constitutes an area of 7127.6 mm<sup>2</sup> actuated area in the Roliner. The experimental and theoretical pressure values were represented with blue and purple colored bars, respectively.

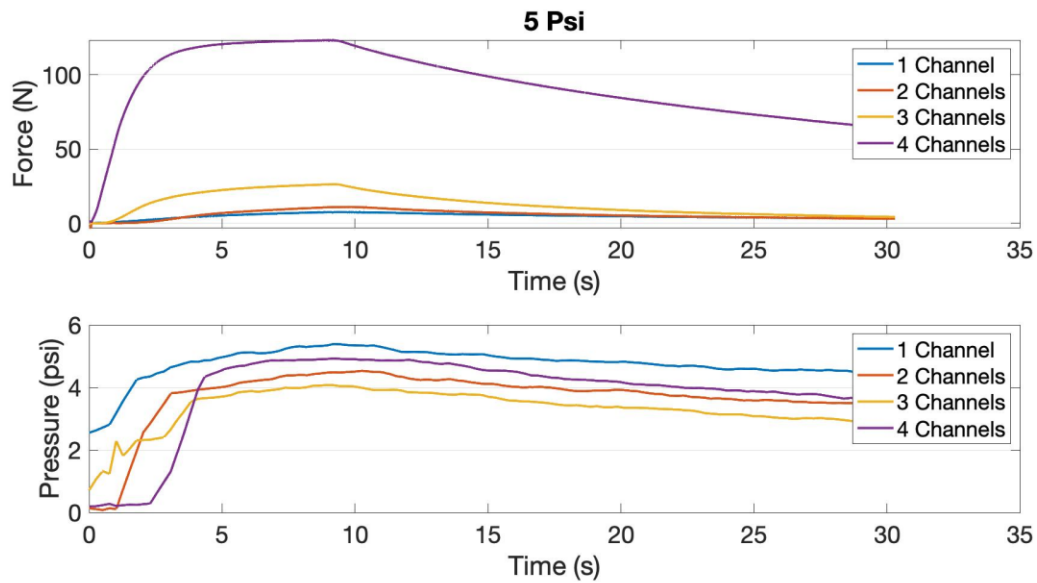

**Fig. S10.** The force exerted by Roliner when actuated with a pressure of 5 psi in 1-4 channel configurations is presented in a period of 30 seconds. (top) The measured fluidics pressure exerted by Roliner when actuated with a pressure of 5 psi in 1-4 channel configurations is presented in a period of 30 seconds. (bottom). The maximum points were used in Fig. 4. of the main article.

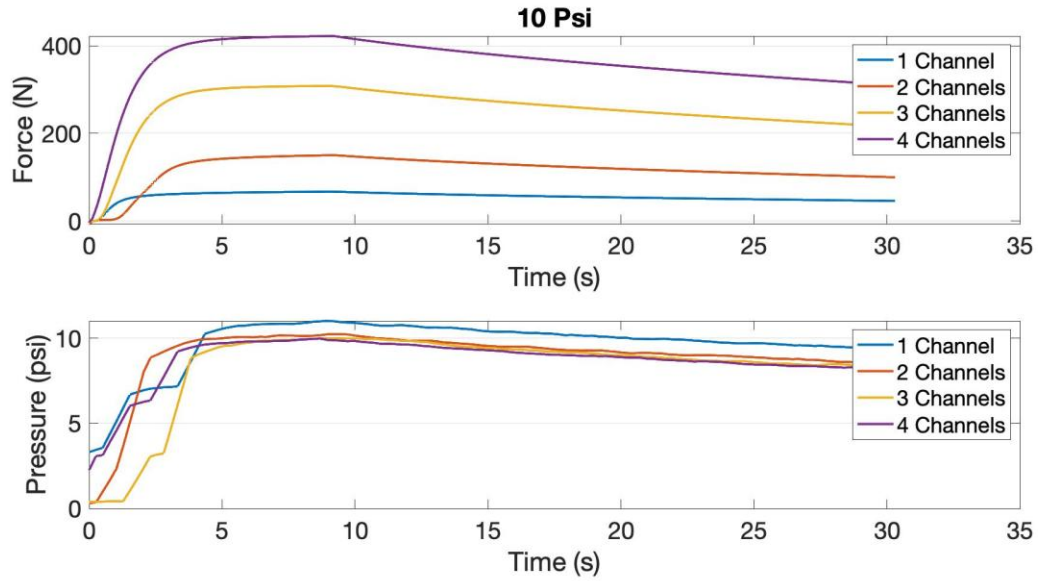

**Fig. S11.** The force exerted by Roliner when actuated with a pressure of 10 psi in 1-4 channel configurations is presented in a period of 30 seconds. (top) The measured fluidics pressure exerted by Roliner when actuated with a pressure of 10 psi in 1-4 channel configurations is presented in a period of 30 seconds. (bottom). The maximum points were used in Fig. 4. of the main article.

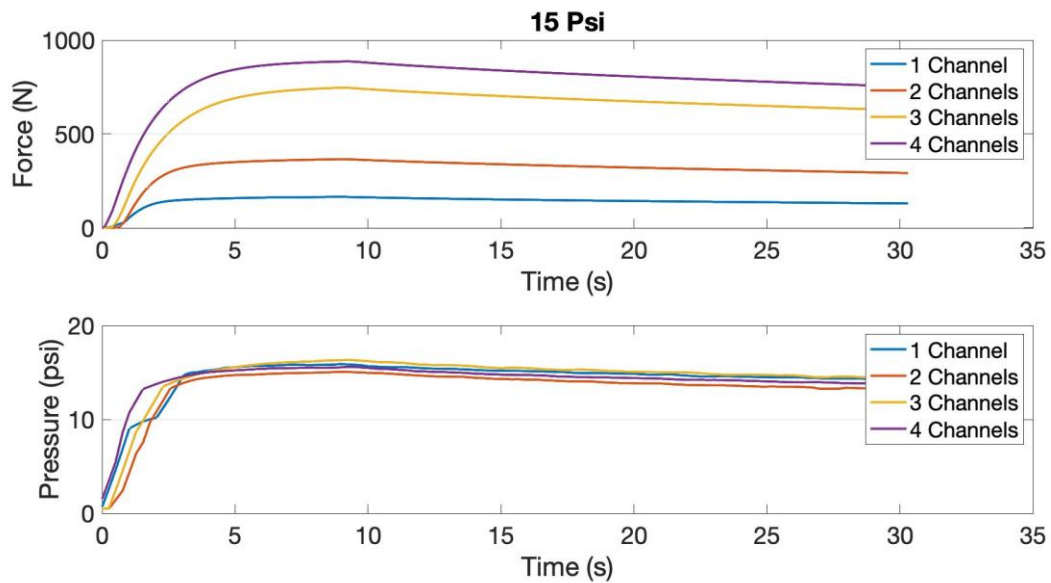

**Fig. S12.** The force exerted by Roliner when actuated with a pressure of 15 psi in 1-4 channel configurations is presented in a period of 30 seconds. (top) The measured fluidics pressure exerted by Roliner when actuated with a pressure of 15 psi in 1-4 channel configurations is presented in a period of 30 seconds. (bottom). The maximum points were used in Fig. 4. of the main article.



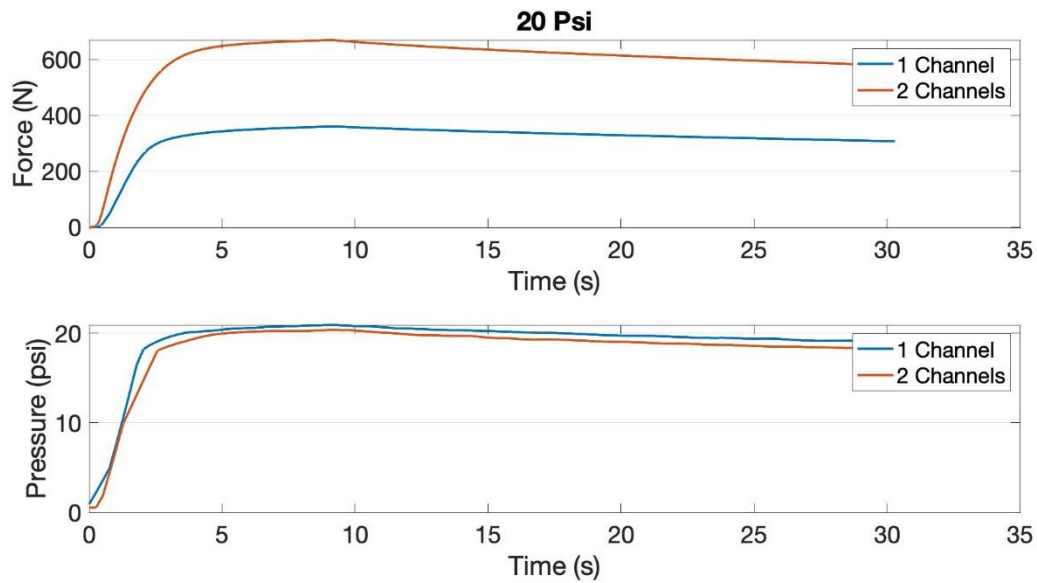

**Fig. S13.** The force exerted by Roliner when actuated with a pressure of 20 psi in 1-2 channel configurations is presented in a period of 30 seconds. (top) The measured fluidics pressure exerted by Roliner when actuated with a pressure of 20 psi in 1-2 channel configurations is presented in a period of 30 seconds. (bottom). The maximum points were used in Fig. 4. of the main article.

## Gait Cycle Analysis

The definition of the tracked parameters in gait cycle analysis are listed below:

**Stance/Swing Time:** The duration a foot is in contact with the ground during a gait cycle, while swing time denotes the period the foot is off the ground. Increased stance time might indicate impaired balance and muscle or joint weakness, leading to a more cautious gait.

**Vertical Ground Reaction Force (GRF):** Vertical GRF measures the force exerted by the ground on the body in the vertical direction during walking or running. Lower GRF might be seen in walking or in individuals with softer gait patterns to minimize joint loading or in amputees who don't trust their prosthetic leg.

**Cadence:** The number of steps taken per minute, is a fundamental parameter of gait speed and rhythmicity. Higher cadence is typically associated with a quicker, more efficient walking or running pace, often seen in athletes. Lower cadence may indicate fatigue, reduced mobility, or balance issues. Lower cadence, however, can also be observed in experimental setups or devices where the user is not accustomed to the environment.

**Stride Length/Width:** Stride length is the distance between successive placements of the same foot, while stride width is the lateral distance between the feet during walking. Correlated with cadence, increased stride length is often associated with faster walking speeds and better overall gait efficiency, typical in younger, healthy adults. Increased stride width, on the other hand, may suggest a compensatory mechanism for balance, which is common in individuals with cerebellar ataxia.

**Range of Motion (ROM):** The range of motion for the ankle, hip, and knee joints during gait is critical for evaluating joint flexibility and functionality. Greater ROM in these joints generally reflects better joint health and flexibility, which is essential for efficient gait. Reduced ROM, such as limited ankle

dorsiflexion, can impair gait patterns and is often observed in conditions like stroke or joint contractures, leading to a shuffling gait.

**Self-Selected Speed:** Self-selected speed is the walking speed that an individual chooses naturally. Higher self-selected speed indicates better functional mobility and cardiovascular fitness, commonly seen in healthy adults. Lower self-selected speed is often a sign of decreased functional capacity and can be predictive of frailty and increased fall risk, frequently observed in older adults or those with chronic conditions. Similar to cadence, self-selected speed can decrease when walking in an unfamiliar environment with unfamiliar wearable gear.

**Table S3.** The gait cycle analysis of prosthesis user SJ03. The user SJ03 had left leg transfemoral amputation. The gait cycle was tracked while the user was equipped with user's own passive liner (as control), and Roliner in both passive and active (actuated) forms. The description of the parameters was represented in above section. The column named "sound" designates the sound leg. The column named "prosthetic" designates the amputated leg.

| Parameters                     | Control |       |            |       | Roliner - Passive |       |            |       | Roliner - Active |       |            |       |
|--------------------------------|---------|-------|------------|-------|-------------------|-------|------------|-------|------------------|-------|------------|-------|
|                                | Sound   |       | Prosthetic |       | Sound             |       | Prosthetic |       | Sound            |       | Prosthetic |       |
|                                | Mean    | SD    | Mean       | SD    | Mean              | SD    | Mean       | SD    | Mean             | SD    | Mean       | SD    |
| Cadence (step/min)             | 49.83   | 2.01  | 54.22      | 6.95  | 52.2              | 3.43  | 55.69      | 7.52  | 54.06            | 6.62  | 51.64      | 1.39  |
| Vertical GRF - 1st Peak (N/kg) | N/A     |       | N/A        |       | N/A               |       | N/A        |       | N/A              |       | N/A        |       |
| Vertical GRF - 2nd Peak (N/kg) | N/A     |       | N/A        |       | N/A               |       | N/A        |       | N/A              |       | N/A        |       |
| Hip ROM (deg)                  | 25.27   | 27.72 | 36.64      | 0.66  | 25.7              | 28.17 | 35.7       | 1.55  | 39.34            | 22.04 | 35.05      | 1.37  |
| Knee ROM (deg)                 | 32.4    | 35.49 | 63.05      | 0.68  | 33.87             | 37.13 | 63.9       | 1.25  | 49.38            | 27.88 | 63.49      | 0.72  |
| Ankle ROM (deg)                | 16.56   | 18.16 | 11.07      | 0.16  | 16.15             | 17.77 | 11.27      | 0.56  | 25.19            | 14.13 | 10.91      | 0.09  |
| Stance time (% of gait cycle)  | 68.99   | 1.49  | 57.63      | 5.74  | 65.06             | 2.8   | 55.00      | 6.51  | 66.24            | 4.15  | 59.74      | 1.2   |
| Swing time (% of gait cycle)   | 31.01   | 1.49  | 42.37      | 5.74  | 34.93             | 2.8   | 45.00      | 6.51  | 33.76            | 4.15  | 40.25      | 1.2   |
| Stride Length (m)              | 1.28    | 0.32  | 1.58       | 0.06  | 1.16              | 0.51  | 1.58       | 0.06  | 1.47             | 0.2   | 1.57       | 0.03  |
| Stride Width (mm)              | 44.27   | 40.2  | 45.55      | 15.27 | 31.82             | 12.99 | 66.45      | 21.72 | 58.29            | 24.2  | 56.48      | 12.83 |
| Pistoning (mm)                 | N/A     |       | 38.22      | 1.8   | N/A               |       | 41.33      | 2.48  | N/A              |       | 39.2       | 2.77  |
| Self Selected Speed (km/h)     | 4.314   |       |            |       | 4.7049            |       |            |       | 3.3932           |       |            |       |

**Table S4.** The gait cycle analysis of prosthesis user SJ04. The user SJ04 had left leg transfemoral amputation. The gait cycle was tracked while the user was equipped with user's own passive liner (as control), and Roliner in both passive and active (actuated) forms. The description of the parameters was represented in above section. The column named "sound" designates the sound leg. The column named "prosthetic" designates the amputated leg.

| Parameters                     | Control |       |            |       | Roliner - Passive |    |            |    | Roliner - Active |       |            |       |
|--------------------------------|---------|-------|------------|-------|-------------------|----|------------|----|------------------|-------|------------|-------|
|                                | Sound   |       | Prosthetic |       | Sound             |    | Prosthetic |    | Sound            |       | Prosthetic |       |
|                                | Mean    | SD    | Mean       | SD    | Mean              | SD | Mean       | SD | Mean             | SD    | Mean       | SD    |
| Cadence (step/min)             | 52.43   | 1.79  | 53.85      | 1.54  | N/A               |    | N/A        |    | 54.93            | 5.10  | 53.72      | 2.20  |
| Vertical GRF - 1st Peak (N/kg) | 12.04   | 0.32  | 10.44      | 2.41  | N/A               |    | N/A        |    | 12.04            | 0.19  | 12.76      | 1.32  |
| Vertical GRF - 2nd Peak (N/kg) | 10.75   | 0.26  | 9.99       | 0.55  | N/A               |    | N/A        |    | 10.26            | 1.17  | 10.61      | 0.42  |
| Hip ROM (deg)                  | 50.98   | 0.81  | 39.93      | 1957  | N/A               |    | N/A        |    | 44.95            | 22.14 | 45.13      | 1.45  |
| Knee ROM (deg)                 | 59.75   | 1.46  | 55.73      | 27.31 | N/A               |    | N/A        |    | 47.86            | 27.07 | 67.18      | 1.23  |
| Ankle ROM (deg)                | 43.07   | 1.42  | 17.15      | 8.43  | N/A               |    | N/A        |    | 35.79            | 18.04 | 22.66      | 1.62  |
| Stance time (% of gait cycle)  | 64.27   | 1.76  | 62.33      | 2.44  | N/A               |    | N/A        |    | 65.47            | 4.97  | 59.54      | 2.23  |
| Swing time (% of gait cycle)   | 35.72   | 1.76  | 37.66      | 2.44  | N/A               |    | N/A        |    | 34.52            | 4.97  | 40.45      | 2.23  |
| Stride Length (m)              | 1.51    | 0.34  | 1.50       | 0.03  | N/A               |    | N/A        |    | 1.22             | 0.46  | 1.53       | 0.04  |
| Stride Width (mm)              | 55.57   | 25.77 | 77.70      | 25.32 | N/A               |    | N/A        |    | 61.94            | 25.99 | 74.84      | 18.74 |
| Pistoning (mm)                 | N/A     |       | 113.41     | 4.72  | N/A               |    | N/A        |    | N/A              |       | 116.12     | 4.93  |
| Self Selected Speed (km/h)     | 4.4969  |       |            |       | N/A               |    |            |    | 3.696            |       |            |       |

**Table S5.** The gait cycle analysis of prosthesis user SJ05. The user SJ05 had left leg transfemoral amputation. The gait cycle was tracked while the user was equipped with user’s own passive liner (as control), and Roliner in both passive and active (actuated) forms. The description of the parameters was represented in above section. The column named “sound” designates the sound leg. The column named “prosthetic” designates the amputated leg.

|                                | Control |         |            |       | Roliner - Passive |       |            |       | Roliner - Active |       |            |       |
|--------------------------------|---------|---------|------------|-------|-------------------|-------|------------|-------|------------------|-------|------------|-------|
|                                | Sound   |         | Prosthetic |       | Sound             |       | Prosthetic |       | Sound            |       | Prosthetic |       |
| Parameters                     | Mean    | SD      | Mean       | SD    | Mean              | SD    | Mean       | SD    | Mean             | SD    | Mean       | SD    |
| Cadence (step/min)             | 53.17   | 1.48    | 51.89      | 0     | 53.33             | 2.50  | 53.58      | 0.28  | 53.76            | 1.19  | 53.05      | 0.62  |
| Vertical GRF - 1st Peak (N/kg) | 10.71   | 0.46    | 11.23      | 0.33  | 9.91              | 1.44  | 9.03       | 4.16  | 11.06            | 0.47  | 11.33      | 0.50  |
| Vertical GRF - 2nd Peak (N/kg) | 10.50   | 1.33    | 10.45      | 0.16  | 8.81              | 1.75  | 8.97       | 4.12  | 10.32            | 0.50  | 10.52      | 0.36  |
| Hip ROM (deg)                  | 38.19   | 21.39   | 42.49      | 1.09  | 46.97             | 2.27  | 30.47      | 20.32 | 33.26            | 28.81 | 41.40      | 0.81  |
| Knee ROM (deg)                 | 50.17   | 28.14   | 67.19      | 2.20  | 61.26             | 1.76  | 50.05      | 33.45 | 20.97            | 36.33 | 67.08      | 1.93  |
| Ankle ROM (deg)                | 33.00   | 11.08   | 6.72       | 6.14  | 36.57             | 1.70  | 6.93       | 8.27  | 12.21            | 21.16 | 7.46       | 6.46  |
| Stance time (% of gait cycle)  | 63.48   | 1.7818  | 63.06      | 0     | 63.90             | 0.78  | 61.90      | 0.26  | 65.49            | 1.23  | 60.65      | 2.72  |
| Swing time (% of gait cycle)   | 36.51   | 1.7818  | 36.93      | 0     | 36.09             | 0.78  | 38.09      | 0.26  | 34.50            | 1.23  | 39.34      | 2.72  |
| Stride Length (m)              | 0.97    | 0.51    | 1.21       | 0.01  | 1.20              | 0.03  | 1.10       | 0.22  | 0.85             | 0.39  | 1.22       | 0.02  |
| Stride Width (mm)              | 45.47   | 21.1593 | 66.27      | 35.25 | 56.22             | 23.23 | 70.66      | 29.63 | 44.07            | 18.37 | 62.45      | 17.27 |
| Pistoning (mm)                 | N/A     |         | 48.01      | 2.64  | N/A               |       | 44.86      | 1.11  | N/A              |       | 41.32      | 3.75  |
| Self Selected Speed (km/h)     | 3.944   |         |            |       | 3.8572            |       |            |       | 3.6359           |       |            |       |

**Table S6.** The gait cycle analysis of prosthesis user SJ06. The user SJ06 had right leg transfemoral amputation. The gait cycle was tracked while the user was equipped with user’s own passive liner (as control), and Roliner in both passive and active (actuated) forms. The description of the parameters was represented in the above section. The column named “sound” designates the sound leg. The column named “prosthetic” designates the amputated leg.

|                                | Control |       |            |       | Roliner - Passive |       |            |      | Roliner - Active |       |            |       |
|--------------------------------|---------|-------|------------|-------|-------------------|-------|------------|------|------------------|-------|------------|-------|
|                                | Sound   |       | Prosthetic |       | Sound             |       | Prosthetic |      | Sound            |       | Prosthetic |       |
| Parameters                     | Mean    | SD    | Mean       | SD    | Mean              | SD    | Mean       | SD   | Mean             | SD    | Mean       | SD    |
| Cadence (step/min)             | 51.42   | 1.93  | 51.13      | 1.97  | 51.02             | 0.94  | 50.40      | 1.12 | 49.48            | 2.14  | 51.29      | 1.65  |
| Vertical GRF - 1st Peak (N/kg) | 12.10   | 1.11  | 10.26      | 0.34  | 11.44             | 0.48  | 10.49      | 0.22 | 11.62            | 0.39  | 10.72      | 0.32  |
| Vertical GRF - 2nd Peak (N/kg) | 10.42   | 0.43  | 10.16      | 0.36  | 10.62             | 0.31  | 9.740      | 0.24 | 11.02            | 0.36  | 9.77       | 0.14  |
| Hip ROM (deg)                  | 39.80   | 19.51 | 40.32      | 0.93  | 46.92             | 1.24  | 37.89      | 1.77 | 32.85            | 25.51 | 7.14       | 17.50 |
| Knee ROM (deg)                 | 54.95   | 26.4  | 67.12      | 1.48  | 64.63             | 1.20  | 67.38      | 1.68 | 45.52            | 36.53 | 10.19      | 24.96 |
| Ankle ROM (deg)                | 19.90   | 9.77  | 13.34      | 2.39  | 29.58             | 2.96  | 13.997     | 1.95 | 35.97            | 33.94 | 3.48       | 8.52  |
| Stance time (% of gait cycle)  | 67.54   | 1.4   | 57.64      | 0.82  | 67.42             | 1.02  | 58.95      | 1.26 | 65.75            | 3.57  | 57.37      | 1.29  |
| Swing time (% of gait cycle)   | 32.45   | 1.4   | 42.44      | 0.82  | 32.58             | 1.02  | 41.05      | 1.26 | 34.25            | 3.57  | 42.63      | 1.29  |
| Stride Length (m)              | 1.25    | 0.027 | 1.27       | 0.034 | 1.25              | 0.01  | 1.28       | 0.02 | 1.29             | 0.12  | 1.25       | 0.02  |
| Stride Width (mm)              | 66.36   | 13.16 | 45.36      | 13.3  | 59.01             | 16.06 | 48.36      | 15.4 | 95.3             | 35.42 | 58.21      | 19.41 |
| Pistoning (mm)                 | N/A     |       | N/A        |       | N/A               |       | N/A        |      | N/A              |       | N/A        |       |
| Self Selected Speed (km/h)     | 3.530   |       |            |       | 3.580             |       |            |      | 3.220            |       |            |       |

## Pre-clinical Inclusion/Exclusion Criteria

This pre-clinical trial was approved by Research Governance and Integrity Team (RGIT) under Imperial College Research Ethics Committee process (ICREC Ref No: 21IC7315) on December 2<sup>nd</sup>, 2021.

### Inclusion Criteria

The amputees are selected from diverse ethnic and social backgrounds. The amputee must:

- be a lower-limb amputee between 18 and 60 years.
- be a healthy adult with no other medical conditions,
- have been an amputee for more than 18 months, traumatic or surgically induced.

### Exclusion Criteria

Members of vulnerable groups are excluded (e.g., those under 18, prisoners, those in a dependent relationship, the mentally ill). Additionally, the amputee must not:

- have had diabetic or other vascular-related amputations,
- be taking any medication or receiving any therapy for another existing condition.
- have any allergies to adhesive materials.
- have undergone surgery in the lower limbs 12 months prior to participation.
- be unable to speak English at a sufficient level to give consent to participate.
- be pregnant.
- be younger than 18 or older than 60 years of age.
- weigh above 120 kg in mass.

**Table S7.** The physical details of the participants in the study.

| Subject Number | Sex | Age | Height (cm) | Weight (kg) | Amputation Side | Amputation Level | Prosthetic Use Experience (years) |
|----------------|-----|-----|-------------|-------------|-----------------|------------------|-----------------------------------|
| SJ01           | M   | 28  | 175         | 78          | Bi-lateral      | Through-knee     | 11                                |
| SJ02           | M   | 29  | 192         | 77.8        | Right Leg       | Transfemoral     | 10                                |
| SJ03           | M   | 43  | 197         | 115         | Left Leg        | Transfemoral     | 9                                 |
| SJ04           | M   | 34  | 183         | 107.9       | Left            | Transfemoral     | 15                                |
| SJ05           | F   | 28  | 155         | 48          | Left            | Transfemoral     | 12                                |
| SJ06           | M   | 58  | 172         | 76          | Right           | Transfemoral     | 11                                |

**Table S8.** The list of prosthetic limbs used by the participants in this study.

| Subject Number | Prosthetic Limb Weight (kg) | Knee Model         | Liner Brand   | Liner Type | Liner Size | Removable Seal | Seal Size | Liner Weight (kg) | Liner Profile |
|----------------|-----------------------------|--------------------|---------------|------------|------------|----------------|-----------|-------------------|---------------|
| SJ01           | N/A                         | Stubbies           | Ossur 4Seal   | Seal-in    | N/A        | No             | N/A       | N/A               | Conical       |
| SJ02           | 5.0                         | Ossur Rheo Knee XC | Ossur Iceross | Seal-in    | 34         | Yes            | 34        | 0.70              | Cylindrical   |
| SJ03           | 5.8                         | Ottobock Genium    | Ossur Iceross | Seal-in    | 36         | Yes            | 47        | 0.80              | Conical       |
| SJ04           | 5.4                         | C-leg 4 Otto Bock  | Ossur Iceross | Seal-in    | 34         | No             | N/A       | 0.85              | Conical       |
| SJ05           | 4.2                         | C-leg 4 Otto Bock  | Ossur Iceross | Seal-in    | 32         | Yes            | 35        | 0.70              | Conical       |
| SJ06           | 4.8                         | Ottobock Genium    | Ossur Iceross | Seal-in    | 38         | No             | N/A       | 0.80              | Conical       |

## PEQ Questionnaire

1. Over the past four weeks, rate the fit of your prosthesis.



TERRIBLE EXCELLENT

2. Over the past four weeks, rate the weight of your prosthesis.

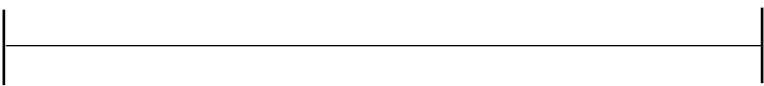

TERRIBLE EXCELLENT

3. Over the past four weeks, rate your comfort while standing *when using your prosthesis*.



TERRIBLE EXCELLENT

4. Over the past four weeks, rate your comfort while sitting *when using your prosthesis*.



TERRIBLE EXCELLENT

5. Over the past four weeks, rate how often you felt off balance *while using your prosthesis*.



ALL THE TIME NOT AT ALL

6. Over the past four weeks, rate how much energy it took to use your prosthesis for as long as you needed it.



COMPLETELY EXHAUSTING NONE AT ALL

7. Over the past four weeks, rate the feel (such as the temperature and texture) of the prosthesis (sock, liner, socket) on your residual limb (stump).



WORST POSSIBLE BEST POSSIBLE

8. Over the past four weeks, rate the ease of putting on (donning) your prosthesis.



TERRIBLE EXCELLENT

9. Over the past four weeks, rate how much you sweat inside your prosthesis (in the sock, liner, socket).



EXTREME AMOUNT NOT AT ALL

10. Over the past four weeks, rate how smelly your prosthesis was at its worst.



EXTREMELY SMELLY NOT AT ALL

11. Over the past four weeks, rate how much of the time your residual limb was swollen to the point of changing the fit of your prosthesis.



ALL THE TIME NEVER

12. Over the past four weeks, rate any rash(es) that you got on your residual limb.



EXTREMELY BOTHERSOME NOT AT ALL

OR check ☐ I had no rashes on my residual limb in the last month.

**13. Over the past four weeks, rate any ingrown hairs (pimples) that were on your residual limb.**

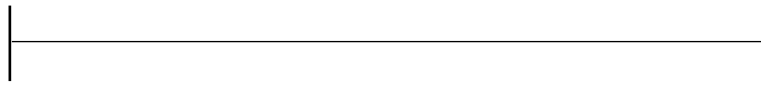

EXTREMELY BOTHERSOME

NOT AT ALL

**OR check \_\_\_ I had no ingrown hairs on my residual limb in the last months.**

**14. Over the past four weeks, rate any blisters or sores that you got on your residual limb.**



EXTREMELY BOTHERSOME

NOT AT ALL

**OR check \_\_\_ I had no blisters or sores on my residual limb in the last months.**

**15. Over the past four weeks, rate how frequently you were frustrated with your prosthesis.**



ALL THE TIME

NEVER

**16. If you were frustrated with your prosthesis at any time over the past month, think of the most frustrating event and rate how you felt at that time.**



EXTREMELY FRUSTRATED

NOT AT ALL

**OR check \_\_\_ I have not been frustrated with my prosthesis.**

**17. Over the past four weeks, rate your ability to walk *when using your prosthesis*.**



CANNOT

NO PROBLEM

**18. Over the past four weeks, rate your ability to walk in close spaces *when using your prosthesis*.**



CANNOT

NO PROBLEM

**19. Over the past four weeks, rate your ability to walk up stairs *when using your prosthesis*.**

  
CANNOT NO PROBLEM

**20. Over the past four weeks, rate how you have felt about being able to walk down stairs *when using your prosthesis*.**

  
CANNOT NO PROBLEM

**21. Over the past four weeks, rate your ability to walk up a steep hill *when using your prosthesis*.**

  
CANNOT NO PROBLEM

**22. Over the past four weeks, rate your ability to walk down a steep hill *when using your prosthesis*.**

  
CANNOT NO PROBLEM

**23. Over the past four weeks, rate your ability to walk on sidewalks and streets *when using your prosthesis*.**

  
CANNOT NO PROBLEM

**24. Over the past four weeks, rate your ability to walk on slippery surfaces (e.g. wet tile, snow, a rainy street, or a boat deck) *when using your prosthesis*.**

  
CANNOT NO PROBLEM



**Table S9.** The prosthesis evaluation questionnaire (PEQ) scores of passive liners for questions related to prosthesis utility (questions 1-8) are tabulated below. The average score and standard deviation (StD) of each question are shown at the end of each question columns. The average score of each participant is shown at the end of each user column.

| Utility (Standard) |       |      |     |       |      |     |       |      |     |       |      |     |       |      |      |       |      |     |       |      |     |       |      |     |       |
|--------------------|-------|------|-----|-------|------|-----|-------|------|-----|-------|------|-----|-------|------|------|-------|------|-----|-------|------|-----|-------|------|-----|-------|
| Question #         | 1     |      |     | 2     |      |     | 3     |      |     | 4     |      |     | 5     |      |      | 6     |      |     | 7     |      |     | 8     |      |     | Score |
| Parameter          | N     | D    | S   | N     | D    | S   | N     | D    | S   | N     | D    | S   | N     | D    | S    | N     | D    | S   | N     | D    | S   | N     | D    | S   |       |
|                    |       |      |     |       |      |     |       |      |     |       |      |     |       |      |      |       |      |     |       |      |     |       |      |     |       |
| SJ01               | 75.5  | 97   | 78% | 36    | 97   | 37% | 92.5  | 97   | 95% | 72.5  | 97   | 75% | 91.5  | 97   | 94%  | 55    | 97   | 57% | 62.5  | 97   | 64% | 92.5  | 97   | 95% | 74.5% |
| SJ02               | 44    | 97   | 45% | 50    | 97   | 52% | 49    | 97   | 51% | 58    | 97   | 60% | 45    | 97   | 46%  | 18.5  | 97   | 19% | 41.5  | 97   | 43% | 61.5  | 97   | 63% | 47.4% |
| SJ03               | 87.5  | 96   | 91% | 87.5  | 96   | 91% | 87    | 96   | 91% | 87    | 96   | 91% | 87.5  | 96   | 91%  | 88.5  | 96   | 92% | 83    | 96   | 86% | 83    | 96   | 86% | 90.0% |
| SJ03(2nd)          | 65.5  | 96.5 | 68% | 84    | 96.5 | 87% | 83    | 96.5 | 86% | 54    | 96.5 | 56% | 63.5  | 96.5 | 66%  | 53.5  | 96.5 | 55% | 66.5  | 96.5 | 69% | 86    | 96.5 | 89% | 72.0% |
| SJ04               | 15    | 96   | 16% | 12    | 96   | 13% | 18.5  | 96   | 19% | 3     | 96   | 3%  | 12.5  | 96   | 13%  | 17.5  | 96   | 18% | 7     | 96   | 7%  | 15    | 96   | 16% | 13.1% |
| SJ04(2nd)          | 9     | 93   | 10% | 6.5   | 93   | 7%  | 23    | 93   | 25% | 2     | 93   | 2%  | 31    | 93   | 33%  | 22    | 93   | 24% | 11    | 93   | 12% | 12    | 93   | 13% | 15.7% |
| SJ05               | 39    | 96   | 41% | 67    | 96   | 70% | 60    | 96   | 63% | 48    | 96   | 50% | 58    | 96   | 60%  | 65    | 96   | 68% | 32.5  | 96   | 34% | 36    | 96   | 38% | 52.8% |
| SJ06               | 29    | 96   | 30% | 69    | 96   | 72% | 74    | 96   | 77% | 93    | 96   | 97% | 69    | 96   | 72%  | 37    | 96   | 39% | 66    | 96   | 69% | 75    | 96   | 78% | 66.7% |
| SJ07               | 88    | 93   | 95% | 92    | 93   | 99% | 84    | 93   | 90% | 92    | 93   | 99% | 93    | 93   | 100% | 85    | 93   | 91% | 74    | 93   | 80% | 91    | 93   | 98% | 94.0% |
| SJ08               | 44.5  | 91   | 49% | 64    | 91   | 70% | 46    | 91   | 51% | 61    | 91   | 67% | 84    | 91   | 92%  | 71    | 91   | 78% | 43    | 91   | 47% | 65    | 91   | 71% | 65.7% |
| Average            | 52%   |      |     | 60%   |      |     | 65%   |      |     | 60%   |      |     | 67%   |      |      | 54%   |      |     | 51%   |      |     | 65%   |      |     | 59.2% |
| StD                | 29.9% |      |     | 32.0% |      |     | 27.8% |      |     | 34.6% |      |     | 29.1% |      |      | 28.5% |      |     | 27.3% |      |     | 31.9% |      |     | 27.6% |

**Table S10.** The prosthesis evaluation questionnaire (PEQ) scores of Roliner for questions related to prosthesis utility (questions 1-8) are tabulated below. The average score and standard deviation (StD) of each question are shown at the end of each question columns. The average score of each participant is shown at the end of each user column.

| Utility (Roller) |      |     |      |     |      |       |      |     |       |      |     |       |      |     |       |      |     |       |      |     |       |      |     |       |       |
|------------------|------|-----|------|-----|------|-------|------|-----|-------|------|-----|-------|------|-----|-------|------|-----|-------|------|-----|-------|------|-----|-------|-------|
| Question #       | 1    |     |      | 2   |      |       | 3    |     |       | 4    |     |       | 5    |     |       | 6    |     |       | 7    |     |       | 8    |     |       | Score |
| Parameter        | N    | D   | S    | N   | D    | S     | N    | D   | S     | N    | D   | S     | N    | D   | S     | N    | D   | S     | N    | D   | S     | N    | D   | S     |       |
|                  |      |     |      |     |      |       |      |     |       |      |     |       |      |     |       |      |     |       |      |     |       |      |     |       |       |
| SJ01             | 87.5 | 97  | 90%  | 48  | 96.5 | 50%   | 91   | 96  | 95%   | 59   | 96  | 61%   | 73.5 | 96  | 77%   | 48   | 98  | 49%   | 61.5 | 98  | 63%   | 72.5 | 98  | 74%   | 69.8% |
| SJ02             | 83.5 | 97  | 86%  | 75  | 97   | 77%   | 76.5 | 97  | 79%   | 77   | 97  | 79%   | 82.5 | 97  | 85%   | 56   | 97  | 58%   | 66   | 97  | 68%   | 62.5 | 97  | 64%   | 74.6% |
| SJ03             | 88   | 96  | 92%  | 89  | 96   | 93%   | 93   | 96  | 97%   | 83   | 96  | 86%   | 87   | 96  | 91%   | 84.5 | 96  | 88%   | 87   | 96  | 91%   | 84   | 96  | 88%   | 90.6% |
| SJ03(2nd)        | N/A  | N/A | N/A  | N/A | N/A  | N/A   | N/A  | N/A | N/A   | N/A  | N/A | N/A   | N/A  | N/A | N/A   | N/A  | N/A | N/A   | N/A  | N/A | N/A   | N/A  | N/A | N/A   | N/A   |
| SJ04             | 76   | 95  | 80%  | 75  | 95   | 79%   | 73   | 95  | 77%   | 59.5 | 95  | 63%   | 67.5 | 95  | 71%   | 59   | 96  | 61%   | 52   | 96  | 54%   | 37   | 96  | 39%   | 65.5% |
| SJ04(2nd)        | 69.5 | 96  | 72%  | 55  | 96   | 57%   | 80   | 96  | 83%   | 51   | 96  | 53%   | 54.5 | 96  | 57%   | 53.5 | 96  | 56%   | 70   | 96  | 73%   | 31   | 96  | 32%   | 60.5% |
| SJ05             | 76   | 93  | 82%  | 79  | 93   | 85%   | 82   | 93  | 88%   | 70   | 93  | 75%   | 89   | 93  | 96%   | 87   | 93  | 94%   | 85   | 93  | 91%   | 79   | 93  | 85%   | 87.0% |
| SJ06             | 60   | 91  | 66%  | 91  | 91   | 100%  | 63   | 91  | 69%   | 73   | 91  | 80%   | 91   | 91  | 100%  | 87   | 91  | 96%   | 85   | 91  | 93%   | 81   | 91  | 89%   | 86.7% |
| SJ07             | N/A  | N/A | N/A  | N/A | N/A  | N/A   | N/A  | N/A | N/A   | N/A  | N/A | N/A   | N/A  | N/A | N/A   | N/A  | N/A | N/A   | N/A  | N/A | N/A   | N/A  | N/A | N/A   | N/A   |
| SJ08             | N/A  | N/A | N/A  | N/A | N/A  | N/A   | N/A  | N/A | N/A   | N/A  | N/A | N/A   | N/A  | N/A | N/A   | N/A  | N/A | N/A   | N/A  | N/A | N/A   | N/A  | N/A | N/A   | N/A   |
| Average          |      |     | 81%  |     |      | 77%   |      |     | 84%   |      |     | 71%   |      |     | 82%   |      |     | 72%   |      |     | 76%   |      |     | 67%   | 76.4% |
| StD              |      |     | 9.4% |     |      | 18.1% |      |     | 10.0% |      |     | 12.2% |      |     | 15.2% |      |     | 19.9% |      |     | 15.7% |      |     | 23.4% | 11.8% |

**Table S11.** The PEQ prosthesis utility score for each participant using both passive liners and Roliner are tabulated below. The average score and standard deviation (StD) of prosthesis utility scores for passive liners and Roliner are shown at the end of each question columns. The difference between passive liner and Roliner for each participant are shown at the end of each row.

**PEQ Utility Summary**

|                  | PEQ Standard | PEQ Roliner | Delta Δ |
|------------------|--------------|-------------|---------|
| <b>SJ01</b>      | 74.5%        | 69.8%       | -4.7%   |
| <b>SJ02</b>      | 47.4%        | 74.6%       | 27.3%   |
| <b>SJ03</b>      | 90.0%        | 90.6%       | 0.6%    |
| <b>SJ03(2nd)</b> | 72.0%        | N/A         | N/A     |
| <b>SJ04</b>      | 13.1%        | 65.5%       | 52.4%   |
| <b>SJ04(2nd)</b> | 15.7%        | 60.5%       | 44.8%   |
| <b>SJ05</b>      | 52.8%        | 87.0%       | 34.2%   |
| <b>SJ06</b>      | 66.7%        | 86.7%       | 20.0%   |
| <b>SJ07</b>      | 94.0%        | N/A         | N/A     |
| <b>SJ08</b>      | 65.7%        | N/A         | N/A     |
| <b>Average</b>   | 59.2%        | 76.4%       | 24.9%   |
| <b>StD</b>       | 27.6%        | 11.8%       | 21.3%   |

**Table S12.** The prosthesis evaluation questionnaire (PEQ) scores of passive liners for questions related to residual limb health (questions 9-14) are tabulated below. The average score and standard deviation (StD) of each question are shown at the end of each question columns. The average score of each participant are shown at the end of each user column.

| Residual Health (Standard) |       |      |     |       |      |      |       |      |      |       |      |      |       |      |      |       |      |      |       |
|----------------------------|-------|------|-----|-------|------|------|-------|------|------|-------|------|------|-------|------|------|-------|------|------|-------|
| Question #                 | 9     |      |     | 10    |      |      | 11    |      |      | 12    |      |      | 13    |      |      | 14    |      |      | Score |
| Parameter                  | N     | D    | S   | N     | D    | S    | N     | D    | S    | N     | D    | S    | N     | D    | S    | N     | D    | S    |       |
| SJ01                       | 75    | 97   | 77% | 79    | 97   | 81%  | 65    | 97   | 67%  | 97    | 97   | 100% | 97    | 97   | 100% | 47    | 97   | 48%  | 79.0% |
| SJ02                       | 53.5  | 97   | 55% | 80.5  | 97   | 83%  | 56.5  | 97   | 58%  | 4.5   | 97   | 5%   | 90.5  | 97   | 93%  | 3.5   | 97   | 4%   | 49.7% |
| SJ03                       | 70.5  | 96   | 73% | 92.5  | 96   | 96%  | 96    | 96   | 100% | 87.5  | 96   | 91%  | 83    | 96   | 86%  | 96    | 96   | 100% | 91.2% |
| SJ03(2nd)                  | 68    | 96.5 | 70% | 96.5  | 96.5 | 100% | 96.5  | 96.5 | 100% | 83    | 96.5 | 86%  | 83    | 96.5 | 86%  | 96.5  | 96.5 | 100% | 90.4% |
| SJ04                       | 2     | 96   | 2%  | 14    | 96   | 15%  | 63.5  | 96   | 66%  | 96    | 96   | 100% | 1     | 96   | 1%   | 96    | 96   | 100% | 47.3% |
| SJ04(2nd)                  | 2     | 93   | 2%  | 2     | 93   | 2%   | 57    | 93   | 61%  | 6     | 93   | 6%   | 6     | 93   | 6%   | 3     | 93   | 3%   | 13.6% |
| SJ05                       | 21.5  | 96   | 22% | 33    | 96   | 34%  | 35    | 96   | 36%  | 61    | 96   | 64%  | 91    | 96   | 95%  | 84    | 96   | 88%  | 56.5% |
| SJ06                       | 57    | 96   | 59% | 95    | 96   | 99%  | 94    | 96   | 98%  | 95    | 96   | 99%  | 95    | 96   | 99%  | 94    | 96   | 98%  | 92.0% |
| SJ07                       | 66    | 93   | 71% | 64    | 93   | 69%  | 88    | 93   | 95%  | 55    | 93   | 59%  | 93    | 93   | 100% | 62    | 93   | 67%  | 76.7% |
| SJ08                       | 11    | 91   | 12% | 89    | 91   | 98%  | 88    | 91   | 97%  | 25    | 91   | 27%  | 77    | 91   | 85%  | 18.5  | 91   | 20%  | 56.5% |
| Average                    | 45%   |      |     | 68%   |      |      | 78%   |      |      | 64%   |      |      | 75%   |      |      | 63%   |      |      | 65.3% |
| StD                        | 31.2% |      |     | 37.1% |      |      | 22.7% |      |      | 38.3% |      |      | 38.1% |      |      | 40.9% |      |      | 25.2% |

**Table S13.** The prosthesis evaluation questionnaire (PEQ) scores of Roliner for questions related to residual limb health (questions 9-14) are tabulated below. The average score and standard deviation (StD) of each question are shown at the end of each question columns. The average score of each participant are shown at the end of each user column.

| Residual Health (Roliner) |      |      |       |      |      |       |      |     |       |     |     |       |     |     |       |     |     |       |
|---------------------------|------|------|-------|------|------|-------|------|-----|-------|-----|-----|-------|-----|-----|-------|-----|-----|-------|
| Question #                | 9    |      |       | 10   |      |       | 11   |     |       | 12  |     |       | 13  |     |       | 14  |     |       |
| Parameter                 | N    | D    | S     | N    | D    | S     | N    | D   | S     | N   | D   | S     | N   | D   | S     | N   | D   | S     |
| SJ01                      | 83.5 | 98.5 | 85%   | 95.5 | 98.5 | 97%   | 89   | 97  | 92%   | 65  | 97  | 67%   | 97  | 97  | 100%  | 97  | 97  | 100%  |
| SJ02                      | 85   | 97   | 88%   | 94.5 | 97   | 97%   | 73.5 | 97  | 76%   | 68  | 97  | 70%   | 97  | 97  | 100%  | 97  | 97  | 100%  |
| SJ03                      | 79.5 | 96   | 83%   | 96   | 96   | 100%  | 96   | 96  | 100%  | 96  | 96  | 100%  | 96  | 96  | 100%  | 96  | 96  | 100%  |
| SJ03(2nd)                 | N/A  | N/A  | N/A   | N/A  | N/A  | N/A   | N/A  | N/A | N/A   | N/A | N/A | N/A   | N/A | N/A | N/A   | N/A | N/A | N/A   |
| SJ04                      | 15   | 96   | 16%   | 12.5 | 96   | 13%   | 59   | 96  | 61%   | 96  | 96  | 100%  | 96  | 96  | 100%  | 96  | 96  | 100%  |
| SJ04(2nd)                 | 48   | 96   | 50%   | 47   | 96   | 49%   | 26   | 96  | 27%   | 45  | 96  | 47%   | 45  | 96  | 47%   | 47  | 96  | 49%   |
| SJ05                      | 87   | 93   | 94%   | 87   | 93   | 94%   | 87   | 93  | 94%   | 81  | 93  | 87%   | 90  | 93  | 97%   | 88  | 93  | 95%   |
| SJ06                      | 88   | 91   | 97%   | 89   | 91   | 98%   | 90   | 91  | 99%   | 90  | 91  | 99%   | 90  | 91  | 99%   | 89  | 91  | 98%   |
|                           | N/A  | N/A  | N/A   | N/A  | N/A  | N/A   | N/A  | N/A | N/A   | N/A | N/A | N/A   | N/A | N/A | N/A   | N/A | N/A | N/A   |
| SJ08                      | N/A  | N/A  | N/A   | N/A  | N/A  | N/A   | N/A  | N/A | N/A   | N/A | N/A | N/A   | N/A | N/A | N/A   | N/A | N/A | N/A   |
| Average                   |      |      | 73%   |      |      | 78%   |      |     | 78%   |     |     | 81%   |     |     | 92%   |     |     | 92%   |
| StD                       |      |      | 29.6% |      |      | 34.0% |      |     | 26.5% |     |     | 20.6% |     |     | 19.8% |     |     | 18.9% |

**Table S14.** The PEQ residual limb health score for each participant using both passive liners and Roliner are tabulated below. The average score and standard deviation (StD) of prosthesis utility scores for passive liners and Roliner are shown at the end of each question columns. The difference between passive liner and Roliner for each participant are shown in the end of each row.

| PEQ Residual Limb Health Summary |              |             |         |
|----------------------------------|--------------|-------------|---------|
|                                  | PEQ Standard | PEQ Roliner | Delta Δ |
| SJ01                             | 79.0%        | 90.1%       | 11.0%   |
| SJ02                             | 49.7%        | 88.5%       | 38.8%   |
| SJ03                             | 91.2%        | 97.1%       | 5.9%    |
| SJ03(2nd)                        | 90.4%        | N/A         | N/A     |
| SJ04                             | 47.3%        | 65.0%       | 17.7%   |
| SJ04(2nd)                        | 13.6%        | 44.8%       | 31.2%   |
| SJ05                             | 56.5%        | 93.2%       | 36.7%   |
| SJ06                             | 92.0%        | 98.2%       | 6.2%    |
| SJ07                             | 76.7%        | N/A         | N/A     |
| SJ08                             | 56.5%        | N/A         | N/A     |
| Average                          | 65.3%        | 82.4%       | 21.1%   |
| StD                              | 63.9%        | 20.0%       | 14.3%   |

**Table S15.** The prosthesis evaluation questionnaire (PEQ) scores of passive liners for questions related to frustration (questions 15-16) are tabulated below. The average score and standard deviation (StD) of each question are shown at the end of each question columns. The average score of each participant are shown at the end of each user column.

| Frustration (Standard) |       |      |     |       |      |      |       |  |
|------------------------|-------|------|-----|-------|------|------|-------|--|
| Question #             | 15    |      |     | 16    |      |      | Score |  |
| Parameter              | N     | D    | S   | N     | D    | S    |       |  |
| SJ01                   | 62    | 97   | 64% | 7     | 97   | 7%   | 35.6% |  |
| SJ02                   | 15    | 97   | 15% | 1.5   | 97   | 2%   | 8.5%  |  |
| SJ03                   | 87    | 96   | 91% | 96    | 96   | 100% | 95.3% |  |
| SJ03(2nd)              | 79.5  | 96.5 | 82% | 12.5  | 96.5 | 13%  | 47.7% |  |
| SJ04                   | 0     | 96   | 0%  | 0     | 96   | 0%   | 0.0%  |  |
| SJ04(2nd)              | 0     | 96   | 0%  | 0     | 96   | 0%   | 0.0%  |  |
| SJ05                   | 74.5  | 96   | 78% | 74.5  | 96   | 78%  | 77.6% |  |
| SJ06                   | 86    | 96   | 90% | 76    | 96   | 79%  | 84.4% |  |
| SJ07                   | 92    | 93   | 99% | 93    | 93   | 100% | 99.5% |  |
| SJ08                   | 29    | 91   | 32% | 6     | 91   | 7%   | 19.2% |  |
| Average                | 55%   |      |     | 39%   |      |      | 46.8% |  |
| StD                    | 39.3% |      |     | 44.4% |      |      | 46.8% |  |

**Table S 16.** The prosthesis evaluation questionnaire (PEQ) scores of Roliner for questions related to frustration (questions 15-16) are tabulated below. The average score and standard deviation (StD) of each question are shown at the end of each question columns. The average score of each participant is shown at the end of each user column.

| Frustration (Roliner) |       |     |     |       |     |      |       |  |
|-----------------------|-------|-----|-----|-------|-----|------|-------|--|
| Question #            | 15    |     |     | 16    |     |      | Score |  |
| Parameter             | N     | D   | S   | N     | D   | S    |       |  |
| SJ01                  | 70    | 97  | 72% | 97    | 97  | 100% | 86.1% |  |
| SJ02                  | 89    | 97  | 92% | 97    | 97  | 100% | 95.9% |  |
| SJ03                  | 91    | 96  | 95% | 96    | 96  | 100% | 97.4% |  |
| SJ03(2nd)             | N/A   | N/A | N/A | N/A   | N/A | N/A  | N/A   |  |
| SJ04                  | 66    | 96  | 69% | 96    | 96  | 100% | 84.4% |  |
| SJ04(2nd)             | 70    | 96  | 73% | 53    | 96  | 55%  | 64.1% |  |
| SJ05                  | 87    | 93  | 94% | 87    | 93  | 94%  | 93.5% |  |
| SJ06                  | 89    | 91  | 98% | 80    | 91  | 88%  | 92.9% |  |
| SJ07                  | N/A   | N/A | N/A | N/A   | N/A | N/A  | N/A   |  |
| SJ08                  | N/A   | N/A | N/A | N/A   | N/A | N/A  | N/A   |  |
| Average               | 85%   |     |     | 91%   |     |      | 87.7% |  |
| StD                   | 12.6% |     |     | 16.4% |     |      | 14.5% |  |

**Table S17.** The PEQ frustration score for each participant using both passive liners and Roliner are tabulated below. The average score and standard deviation (StD) of prosthesis utility scores for passive liners and Roliner are shown at the end of each question columns. The difference between passive liner and Roliner for each participant are shown at the end of each row.

**PEQ Frustration Summary**

|                  | PEQ Standard | PEQ Roliner | Delta Δ |
|------------------|--------------|-------------|---------|
| <b>SJ01</b>      | 35.6%        | 86.1%       | 50.5%   |
| <b>SJ02</b>      | 8.5%         | 95.9%       | 87.4%   |
| <b>SJ03</b>      | 95.3%        | 97.4%       | 2.1%    |
| <b>SJ03(2nd)</b> | 47.7%        | N/A         | N/A     |
| <b>SJ04</b>      | 0.0%         | 84.4%       | 84.4%   |
| <b>SJ04(2nd)</b> | 0.0%         | 64.1%       | 64.1%   |
| <b>SJ05</b>      | 77.6%        | 93.5%       | 15.9%   |
| <b>SJ06</b>      | 84.4%        | 92.9%       | 8.5%    |
| <b>SJ07</b>      | 99.5%        | N/A         | N/A     |
| <b>SJ08</b>      | 46.8%        | N/A         | N/A     |
| <b>Average</b>   | 49.5%        | 87.7%       | 44.7%   |
| <b>StD</b>       | 38.6%        | 11.5%       | 36.0%   |

**Table S18.** The prosthesis evaluation questionnaire (PEQ) scores of passive liners for questions related to ambulation (questions 17-24) are tabulated below. The average score and standard deviation (StD) of each question are shown at the end of each question columns. The average score of each participant are shown at the end of each user column.

**Ambulation (Standard)**

| Question #       | 17    |      |            | 18    |      |            | 19    |      |            | 20    |      |            | 21    |      |            | 22    |      |            | 23    |      |            | 24    |      |            | Score        |
|------------------|-------|------|------------|-------|------|------------|-------|------|------------|-------|------|------------|-------|------|------------|-------|------|------------|-------|------|------------|-------|------|------------|--------------|
| Parameter        | N     | D    | S          | N     | D    | S          | N     | D    | S          | N     | D    | S          | N     | D    | S          | N     | D    | S          | N     | D    | S          | N     | D    | S          |              |
| <b>SJ01</b>      | 78    | 98.5 | <b>79%</b> | 88.5  | 98.5 | <b>90%</b> | 12.5  | 98.5 | <b>13%</b> | 13    | 98.5 | <b>13%</b> | 54.5  | 99   | <b>55%</b> | 44.5  | 99.5 | <b>45%</b> | 89    | 97.5 | <b>91%</b> | 4     | 98   | <b>4%</b>  | <b>48.8%</b> |
| <b>SJ02</b>      | 45.5  | 97   | <b>47%</b> | 41.5  | 97   | <b>43%</b> | 41.5  | 97   | <b>43%</b> | 56.5  | 97   | <b>58%</b> | 37.5  | 97   | <b>39%</b> | 38    | 97   | <b>39%</b> | 54.5  | 97   | <b>56%</b> | 29    | 97   | <b>30%</b> | <b>44.3%</b> |
| <b>SJ03</b>      | 86.5  | 96   | <b>90%</b> | 87.5  | 96   | <b>91%</b> | 89    | 96   | <b>93%</b> | 87    | 96   | <b>91%</b> | 87    | 96   | <b>91%</b> | 87    | 96   | <b>91%</b> | 88    | 96   | <b>92%</b> | 88.5  | 96   | <b>92%</b> | <b>91.2%</b> |
| <b>SJ03(2nd)</b> | 86    | 96.5 | <b>89%</b> | 64.5  | 96.5 | <b>67%</b> | 65    | 96.5 | <b>67%</b> | 62    | 96.5 | <b>64%</b> | 37.5  | 96.5 | <b>39%</b> | 27    | 96.5 | <b>28%</b> | 83    | 96.5 | <b>86%</b> | 66    | 96.5 | <b>68%</b> | <b>63.6%</b> |
| <b>SJ04</b>      | 29    | 96   | <b>30%</b> | 17    | 96   | <b>18%</b> | 21    | 96   | <b>22%</b> | 27    | 96   | <b>28%</b> | 27    | 96   | <b>28%</b> | 25    | 96   | <b>26%</b> | 24    | 96   | <b>25%</b> | 14    | 96   | <b>15%</b> | <b>24.0%</b> |
| <b>SJ04(2nd)</b> | 18    | 93   | <b>19%</b> | 5     | 93   | <b>5%</b>  | 5     | 93   | <b>5%</b>  | 13    | 93   | <b>14%</b> | 16.5  | 93   | <b>18%</b> | 15.5  | 93   | <b>17%</b> | 13.5  | 93   | <b>15%</b> | 15    | 93   | <b>16%</b> | <b>13.6%</b> |
| <b>SJ05</b>      | 65    | 96   | <b>68%</b> | 66    | 96   | <b>69%</b> | 69.5  | 96   | <b>72%</b> | 74.5  | 96   | <b>78%</b> | 75.5  | 96   | <b>79%</b> | 45.5  | 96   | <b>47%</b> | 63    | 96   | <b>66%</b> | 39    | 96   | <b>41%</b> | <b>64.8%</b> |
| <b>SJ06</b>      | 92    | 96   | <b>96%</b> | 75    | 96   | <b>78%</b> | 6     | 96   | <b>6%</b>  | 92    | 96   | <b>96%</b> | 84    | 96   | <b>88%</b> | 94    | 96   | <b>98%</b> | 84    | 96   | <b>88%</b> | 92    | 96   | <b>96%</b> | <b>80.6%</b> |
| <b>SJ07</b>      | 92    | 93   | <b>99%</b> | 81    | 93   | <b>87%</b> | 88    | 93   | <b>95%</b> | 86    | 93   | <b>92%</b> | 92    | 93   | <b>99%</b> | 80    | 93   | <b>86%</b> | 92    | 93   | <b>99%</b> | 80    | 93   | <b>86%</b> | <b>92.9%</b> |
| <b>SJ08</b>      | 72    | 91   | <b>79%</b> | 73    | 91   | <b>80%</b> | 21    | 91   | <b>23%</b> | 45    | 91   | <b>49%</b> | 48    | 91   | <b>53%</b> | 49    | 91   | <b>54%</b> | 67    | 91   | <b>74%</b> | 2     | 91   | <b>2%</b>  | <b>51.8%</b> |
| <b>Average</b>   | 70%   |      |            | 63%   |      |            | 44%   |      |            | 58%   |      |            | 59%   |      |            | 53%   |      |            | 69%   |      |            | 45%   |      |            | <b>57.6%</b> |
| <b>StD</b>       | 28.1% |      |            | 30.6% |      |            | 35.1% |      |            | 31.7% |      |            | 28.5% |      |            | 28.8% |      |            | 29.1% |      |            | 37.3% |      |            | <b>26.5%</b> |

**Table S19.** The prosthesis evaluation questionnaire (PEQ) scores of Roliner for questions related to ambulation (questions 17-24) are tabulated below. The average score and standard deviation (StD) of each question are shown at the end of each question columns. The average score of each participant is shown at the end of each user column.

| Ambulation (Roliner) |      |     |       |      |      |       |     |      |       |      |      |       |      |      |       |      |     |       |      |      |       |      |      |       |       |
|----------------------|------|-----|-------|------|------|-------|-----|------|-------|------|------|-------|------|------|-------|------|-----|-------|------|------|-------|------|------|-------|-------|
| Question #           | 17   |     |       | 18   |      |       | 19  |      |       | 20   |      |       | 21   |      |       | 22   |     |       | 23   |      |       | 24   |      |       | Score |
| Parameter            | N    | D   | S     | N    | D    | S     | N   | D    | S     | N    | D    | S     | N    | D    | S     | N    | D   | S     | N    | D    | S     | N    | D    | S     |       |
| SJ01                 | 72   | 95  | 76%   | 73.5 | 94.5 | 78%   | 21  | 94.5 | 22%   | 19   | 94.5 | 20%   | 59.5 | 95.5 | 62%   | 34   | 95  | 36%   | 75   | 94.5 | 79%   | 2    | 94.5 | 2%    | 46.9% |
| SJ02                 | 87   | 97  | 90%   | 94   | 97   | 97%   | 59  | 97   | 61%   | 91   | 97   | 94%   | 88.5 | 97   | 91%   | 86.5 | 97  | 89%   | 92.5 | 97   | 95%   | 73.5 | 97   | 76%   | 86.6% |
| SJ03                 | 90.5 | 96  | 94%   | 88.5 | 96   | 92%   | 89  | 96   | 93%   | 88   | 96   | 92%   | 85.5 | 96   | 89%   | 87   | 96  | 91%   | 86   | 96   | 90%   | 84   | 96   | 88%   | 91.0% |
| SJ03(2nd)            | N/A  | N/A | N/A   | N/A  | N/A  | N/A   | N/A | N/A  | N/A   | N/A  | N/A  | N/A   | N/A  | N/A  | N/A   | N/A  | N/A | N/A   | N/A  | N/A  | N/A   | N/A  | N/A  | N/A   |       |
| SJ04                 | 78   | 96  | 81%   | 68   | 96   | 71%   | 67  | 96   | 70%   | 69   | 96   | 72%   | 71   | 96   | 74%   | 64   | 96  | 67%   | 68.5 | 96   | 71%   | 70   | 96   | 73%   | 72.3% |
| SJ04(2nd)            | 69.5 | 96  | 72%   | 52.5 | 96   | 55%   | 57  | 96   | 59%   | 58.5 | 96   | 61%   | 58   | 96   | 60%   | 54   | 96  | 56%   | 55   | 96   | 57%   | 41   | 96   | 43%   | 58.0% |
| SJ05                 | 87   | 93  | 94%   | 88   | 93   | 95%   | 86  | 93   | 92%   | 83   | 93   | 89%   | 83   | 93   | 89%   | 84   | 93  | 90%   | 84   | 93   | 90%   | 80   | 93   | 86%   | 90.7% |
| SJ06                 | 90   | 91  | 99%   | 90   | 91   | 99%   | 66  | 91   | 73%   | 89   | 91   | 98%   | 74   | 91   | 81%   | 90   | 91  | 99%   | 82   | 91   | 90%   | 16   | 91   | 18%   | 82.0% |
| SJ07                 | N/A  | N/A | N/A   | N/A  | N/A  | N/A   | N/A | N/A  | N/A   | N/A  | N/A  | N/A   | N/A  | N/A  | N/A   | N/A  | N/A | N/A   | N/A  | N/A  | N/A   | N/A  | N/A  | N/A   |       |
| SJ08                 | N/A  | N/A | N/A   | N/A  | N/A  | N/A   | N/A | N/A  | N/A   | N/A  | N/A  | N/A   | N/A  | N/A  | N/A   | N/A  | N/A | N/A   | N/A  | N/A  | N/A   | N/A  | N/A  | N/A   |       |
| Average              |      |     | 87%   |      |      | 84%   |     |      | 67%   |      |      | 75%   |      |      | 78%   |      |     | 75%   |      |      | 82%   |      |      | 55%   | 75.4% |
| StD                  |      |     | 10.1% |      |      | 16.5% |     |      | 24.0% |      |      | 27.6% |      |      | 13.0% |      |     | 23.1% |      |      | 13.6% |      |      | 34.4% | 17.2% |

**Table S20.** The PEQ ambulation score for each participant using both passive liners and Roliner are tabulated below. The average score and standard deviation (StD) of prosthesis utility scores for passive liners and Roliner are shown at the end of each question columns. The difference between passive liner and Roliner for each participant are shown at the end of each row.

| PEQ Ambulation Summary |              |             |         |
|------------------------|--------------|-------------|---------|
|                        | PEQ Standard | PEQ Roliner | Delta Δ |
| SJ01                   | 48.8%        | 46.9%       | -1.8%   |
| SJ02                   | 44.3%        | 86.6%       | 42.3%   |
| SJ03                   | 91.2%        | 91.0%       | -0.3%   |
| SJ03(2nd)              | 63.6%        | N/A         | N/A     |
| SJ04                   | 24.0%        | 72.3%       | 48.4%   |
| SJ04(2nd)              | 13.6%        | 58.0%       | 44.4%   |
| SJ05                   | 64.8%        | 90.7%       | 25.9%   |
| SJ06                   | 80.6%        | 82.0%       | 1.4%    |
| SJ07                   | 92.9%        | N/A         | N/A     |
| SJ08                   | 51.8%        | N/A         | N/A     |
| Average                | 57.6%        | 75.4%       | 22.9%   |
| StD                    | 26.5%        | 17.2%       | 22.7%   |

including SJ04

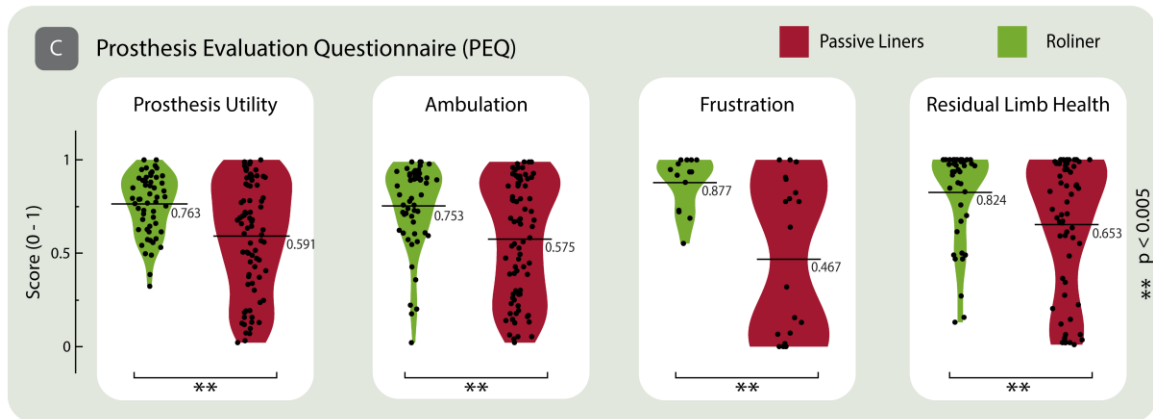

excluding SJ04

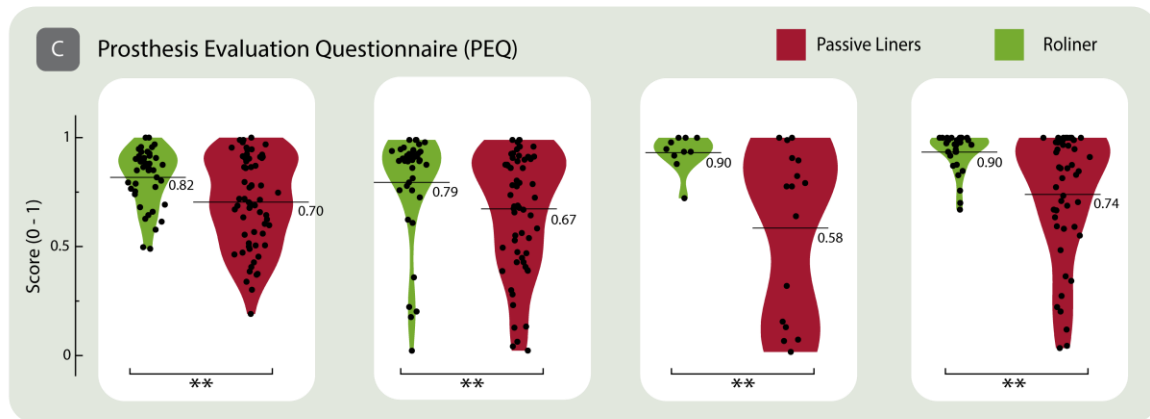

**Fig. S14.** The violin chart comparison of Roliner versus passive liners in terms of prosthetic utility, ambulation, frustration and residual limb health parameters Prosthesis Evaluation Questionnaire (PEQ) scores from the preclinical cohort (except SJ04, removed for potential bias). The scores from each question response from each amputee are shown as black-filled circles. The horizontal line shows the mean score. The mean scores ( $\mu$ ) are shown on the right-hand side of the violin chart. In the violin charts, kernel density estimation was performed using Scott type bandwidth. The individual data points represents the independent PEQ scores from the related section ( $8 \geq n \geq 2$ ) of the questionnaire for each participant ( $n = 6$ ). These were presented as overlaid on the box charts. The  $p$  value calculated using two-sided paired sample t-test. (\*\*) represents statistical significance as  $p < 0.005$ .
